# Supplementary material for: Effectiveness of breed-specific legislation in decreasing the incidence of dog-bite injury hospitalisations in people in the Canadian province of Manitoba
Source: HighWire-hosted journal article supplement (doi:10.1136/injuryprev-2012-040389), 2012-06-30
Supplement: injuryprev-2012-040389-s4.pdf [file injuryprev-2012-040389-s4.pdf]

**Supplementary Table 2** Age distribution and age-specific incidence of hospitalization due to dog-bite injuries and rabies post exposure prophylaxis in Manitoba, pre- and post-BSL implementation. (Online only table.)

| Age, in years | Dog-bite injury hospitalizations |                                                           |                     |                                                           | Rabies post-exposure prophylaxis |                                                           |                     |                                                           |
|---------------|----------------------------------|-----------------------------------------------------------|---------------------|-----------------------------------------------------------|----------------------------------|-----------------------------------------------------------|---------------------|-----------------------------------------------------------|
|               | Pre-implementation*              |                                                           | Post-implementation |                                                           | Pre-implementation*              |                                                           | Post-implementation |                                                           |
|               | N (%) <sup>a</sup>               | Incidence (95% CI <sup>†</sup> ) per 100,000 person-years | N (%) <sup>a</sup>  | Incidence (95% CI <sup>†</sup> ) per 100,000 person-years | N (%) <sup>b</sup>               | Incidence (95% CI <sup>†</sup> ) per 100,000 person-years | N (%) <sup>b</sup>  | Incidence (95% CI <sup>†</sup> ) per 100,000 person-years |
| 0 - < 2       | 22 (4.3)                         | 5.12 (3.21, 7.76)                                         | 22 (6.7)            | 7.43 (4.66, 11.25)                                        | 25 (1.9)                         | 5.82 (3.77, 8.59)                                         | 23 (4.1)            | 7.77 (4.92, 11.66)                                        |
| 2 - < 5       | 113 (22.3)                       | 17.22 (14.19, 20.70)                                      | 46 (13.9)           | 10.12 (7.41, 13.49)                                       | 82 (6.1)                         | 12.49 (9.94, 15.51)                                       | 26 (4.6)            | 5.72 (3.73, 8.38)                                         |
| 5 - < 10      | 89 (17.5)                        | 7.99 (6.41, 9.83)                                         | 49 (14.8)           | 6.36 (4.70, 8.40)                                         | 162 (12.1)                       | 14.54 (12.39, 16.96)                                      | 55 (9.8)            | 7.13 (5.37, 9.29)                                         |
| 10 - < 20     | 86 (17.0)                        | 3.76 (3.01, 4.64)                                         | 40 (12.1)           | 2.62 (1.87, 3.57)                                         | 259 (19.3)                       | 11.32 (9.99, 12.79)                                       | 83 (14.7)           | 5.44 (4.33, 6.75)                                         |
| 20 - < 30     | 45 (8.9)                         | 2.04 (1.48, 2.72)                                         | 35 (10.6)           | 2.06 (1.44, 2.87)                                         | 218 (16.3)                       | 9.86 (8.60, 11.26)                                        | 97 (17.2)           | 5.71 (4.63, 6.97)                                         |
| 30 - < 50     | 82 (16.2)                        | 2.06 (1.64, 2.56)                                         | 67 (20.2)           | 1.85 (1.43, 2.34)                                         | 376 (28.1)                       | 9.47 (8.51, 10.43)                                        | 146 (25.9)          | 4.02 (3.40, 4.73)                                         |
| 50 - < 70     | 49 (9.7)                         | 1.88 (1.39, 2.49)                                         | 46 (13.9)           | 2.14 (1.57, 2.86)                                         | 153 (11.4)                       | 5.88 (4.98, 6.89)                                         | 68 (12.1)           | 3.17 (2.46, 4.02)                                         |
| ≥ 70          | 21 (4.1)                         | 1.56 (0.97, 2.39)                                         | 26 (7.8)            | 2.29 (1.49, 3.35)                                         | 65 (4.9)                         | 4.84 (3.73, 6.16)                                         | 65 (11.6)           | 5.72 (4.42, 7.29)                                         |
| All           | 507 (100.0)                      | 3.47 (3.17, 3.77)                                         | 331 (100.0)         | 2.84 (2.53, 3.15)                                         | 1,340 (100.0)                    | 9.17 (8.68, 9.66)                                         | 563 (100.0)         | 4.83 (4.43, 5.23)                                         |

Abbreviations: BSL, breed-specific legislation.

\* The entire study period (1984-2006) is considered as pre-BSL implementation period for all jurisdictions that have not implemented BSL to date.

† 95% Poisson CI

<sup>a</sup> Significantly different at P-value = 0.001.

<sup>b</sup> Significantly different at P-value < 0.0001.
