# Supplementary figures and images for: Effectiveness of breed-specific legislation in decreasing the incidence of dog-bite injury hospitalisations in people in the Canadian province of Manitoba
Source: HighWire-hosted journal article supplement (doi:10.1136/injuryprev-2012-040389), 2012-06-30

Dog-bite injury hospitalizations  
Incidence per 100,000 person-years

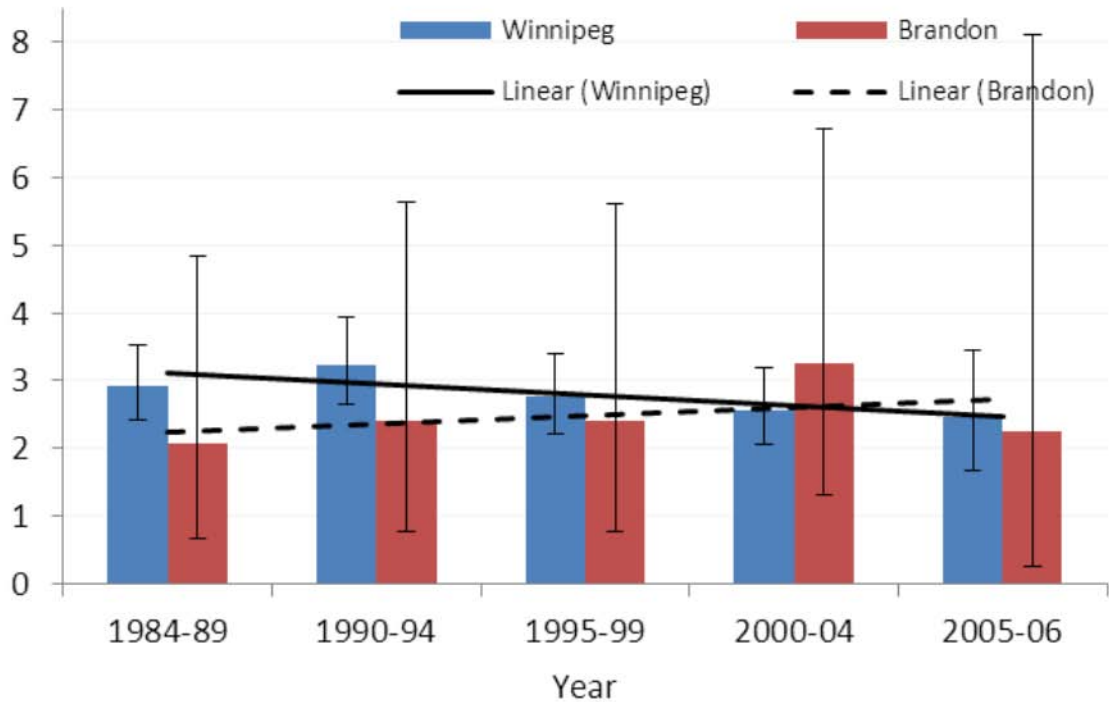

Supplement: injuryprev-2012-040389-s2.pdf [file injuryprev-2012-040389-s2.pdf]
